# Supplementary material
Source: publisher figshare collection journal article supplement (https://brill.figshare.com/articles/dataset/_/23501097)
Supplement: Supplementary file 1 [file 1]

## Sheet: Dataset
TrialID	Season	Date	BirdID	Sex	SocialBrood	LifeStage	HandlingTestNo	HandlingTestStage	HandlingTestAtStage	Boldness_BackTestResponse	Boldness_ProcessingResponse	Boldness_ProcessingResponseAdjusted	Handler	CageTrialNo	CageTrialStage	CageTrialAtStage	Exploration_UniqueSectorVisits	Exploration_SectorVisits	Aggressiveness_MirrorContacts	Aggressiveness_TimeNearMirror
WVWx_2019-10-27	2019	2019-10-27	WVWx	Female	C19.03	nestling	1	N1	1	2	3	3.75	Handler1	na	na	na	na	na	na	na
OBNx_2019-10-27	2019	2019-10-27	OBNx	Male	C19.03	nestling	1	N1	1	4	1	1.25	Handler1	na	na	na	na	na	na	na
GNBx_2019-11-02	2019	2019-11-02	GNBx	Male	C19.04	nestling	1	N1	1	5	1	1.25	Handler1	na	na	na	na	na	na	na
ROWx_2019-11-02	2019	2019-11-02	ROWx	Male	C19.01	nestling	1	N1	1	3	1	1.25	Handler1	na	na	na	na	na	na	na
OHBx_2019-11-02	2019	2019-11-02	OHBx	Female	C19.01	nestling	1	N1	1	3	2	2.5	Handler1	na	na	na	na	na	na	na
RHWx_2019-11-04	2019	2019-11-04	RHWx	Male	C19.13	nestling	1	N1	1	4	2	2.5	Handler1	na	na	na	na	na	na	na
RBYx_2019-11-04	2019	2019-11-04	RBYx	Female	C19.13	nestling	1	N1	1	3	2	2.5	Handler1	na	na	na	na	na	na	na
WYVx_2019-11-09	2019	2019-11-09	WYVx	Female	C19.05	nestling	1	N1	1	6	2	2.5	Handler1	na	na	na	na	na	na	na
VRHx_2019-11-09	2019	2019-11-09	VRHx	Female	C19.05	nestling	1	N1	1	6	2	2.5	Handler1	na	na	na	na	na	na	na
HGWx_2019-11-09	2019	2019-11-09	HGWx	Male	C19.05	nestling	1	N1	1	7	2	2.5	Handler1	na	na	na	na	na	na	na
WORx_2019-11-11	2019	2019-11-11	WORx	Female	C19.11	nestling	1	N1	1	1	0	0	Handler1	na	na	na	na	na	na	na
NHWx_2019-11-11	2019	2019-11-11	NHWx	Female	C19.11	nestling	1	N1	1	3	2	2.5	Handler1	na	na	na	na	na	na	na
WVWx_2019-11-15	2019	2019-11-15	WVWx	Female	C19.03	fledgling	na	na	na	na	na	na	na	1	F1	1	5	11	0	20
RBYx_2019-11-15	2019	2019-11-15	RBYx	Female	C19.13	fledgling	na	na	na	na	na	na	na	1	F1	1	7	54	20	128
RHWx_2019-11-15	2019	2019-11-15	RHWx	Male	C19.13	fledgling	na	na	na	na	na	na	na	1	F1	1	8	41	32	94
RVNx_2019-11-16	2019	2019-11-16	RVNx	Male	C19.24	nestling	1	N1	1	5	3	3.75	Handler1	na	na	na	na	na	na	na
OGWx_2019-11-16	2019	2019-11-16	OGWx	Female	C19.24	nestling	1	N1	1	5	3	3.75	Handler1	na	na	na	na	na	na	na
GWYx_2019-11-16	2019	2019-11-16	GWYx	Male	C19.24	nestling	1	N1	1	4	3	3.75	Handler1	na	na	na	na	na	na	na
VWGx_2019-11-19	2019	2019-11-19	VWGx	Male	C19.16	nestling	1	N1	1	2	1	1.25	Handler1	na	na	na	na	na	na	na
RNHx_2019-11-19	2019	2019-11-19	RNHx	Male	C19.16	nestling	1	N1	1	3	3	3.75	Handler1	na	na	na	na	na	na	na
GBYx_2019-11-19	2019	2019-11-19	GBYx	Female	C19.16	nestling	1	N1	1	4	2	2.5	Handler1	na	na	na	na	na	na	na
YORx_2019-11-19	2019	2019-11-19	YORx	Male	C19.23	nestling	1	N1	1	2	2	2.5	Handler1	na	na	na	na	na	na	na
RGVx_2019-11-19	2019	2019-11-19	RGVx	Female	C19.23	nestling	1	N1	1	3	2	2.5	Handler1	na	na	na	na	na	na	na
BBYx_2019-11-19	2019	2019-11-19	BBYx	Male	C19.23	nestling	1	N1	1	4	2	2.5	Handler1	na	na	na	na	na	na	na
WWBx_2019-11-21	2019	2019-11-21	Wxzz	Female	C19.22	nestling	1	N1	1	5	2	2.5	Handler1	na	na	na	na	na	na	na
OBRx_2019-11-21	2019	2019-11-21	OBRx	Male	C19.22	nestling	1	N1	1	3	2	2.5	Handler1	na	na	na	na	na	na	na
WYVx_2019-11-22	2019	2019-11-22	WYVx	Female	C19.05	fledgling	na	na	na	na	na	na	Handler3	1	F1	1	7	109	11	105
VRHx_2019-11-22	2019	2019-11-22	VRHx	Female	C19.05	fledgling	na	na	na	na	na	na	na	1	F1	1	6	58	0	57
HGWx_2019-11-22	2019	2019-11-22	HGWx	Male	C19.05	fledgling	na	na	na	na	na	na	Handler3	1	F1	1	7	73	36	90
NHWx_2019-11-22	2019	2019-11-22	NHWx	Female	C19.11	fledgling	na	na	na	na	na	na	Handler3	1	F1	1	7	64	2	26
WORx_2019-11-22	2019	2019-11-22	WORx	Female	C19.11	fledgling	na	na	na	na	na	na	Handler3	1	F1	1	6	64	0	37
WWOx_2019-11-22	2019	2019-11-22	WWOx	Male	C19.05	adult	1	A1	1	3	0	0	Handler3	na	na	na	na	na	na	na
WGOx_2019-11-22	2019	2019-11-22	WGOx	Male	C19.11	adult	1	A1	1	3	0	0	Handler3	na	na	na	na	na	na	na
OBOx_2019-11-22	2019	2019-11-22	OBOx	Female	C19.05	adult	1	A1	1	1	3	3	Handler3	na	na	na	na	na	na	na
NxOG_2019-11-22	2019	2019-11-22	NxOG	Male	C19.05	adult	1	A1	1	1	4	4	Handler3	na	na	na	na	na	na	na
NVHx_2019-11-22	2019	2019-11-22	NVHx	Female	C19.11	adult	1	A1	1	1	0	0	Handler3	na	na	na	na	na	na	na
BVOx_2019-11-22	2019	2019-11-22	BVOx	Male	C19.11	adult	1	A1	1	2	0	0	Handler3	na	na	na	na	na	na	na
VYYx_2019-11-23	2019	2019-11-23	VYYx	Female	C19.20	nestling	1	N1	1	2	3	3.75	Handler1	na	na	na	na	na	na	na
OHWx_2019-11-23	2019	2019-11-23	OHWx	Male	C19.20	nestling	1	N1	1	2	3	3.75	Handler1	na	na	na	na	na	na	na
WRBx_2019-11-25	2019	2019-11-25	WRBx	Female	C19.28	nestling	1	N1	1	2	2	2.5	Handler1	na	na	na	na	na	na	na
NGYx_2019-11-25	2019	2019-11-25	NGYx	Female	C19.28	nestling	1	N1	1	5	2	2.5	Handler1	na	na	na	na	na	na	na
HOHx_2019-11-25	2019	2019-11-25	HOHx	Male	C19.28	nestling	1	N1	1	6	2	2.5	Handler1	na	na	na	na	na	na	na
NxVV_2019-11-29	2019	2019-11-29	NxVV	Female	na	adult	1	A1	1	0	0	0	Handler3	1	A1	1	3	41	34	137
RBWx_2019-11-29	2019	2019-11-29	RBWx	Male	na	adult	1	A1	1	0	0	0	Handler2	1	A1	1	3	3	0	0
WHHx_2019-11-29	2019	2019-11-29	WHHx	Male	na	adult	1	A1	1	0	0	0	Handler3	1	A1	1	6	64	3	45
WYYx_2019-11-29	2019	2019-11-29	WYYx	Male	na	adult	1	A1	1	0	1	1	Handler2	1	A1	1	6	151	0	0
LbHWx_2019-11-29	2019	2019-11-29	BHWx	Male	na	adult	1	A1	1	0	2	2	Handler2	1	A1	1	6	44	0	46
HxWH_2019-12-04	2019	2019-12-04	HxWH	Female	na	adult	1	A1	1	0	3	3	Handler2	1	A1	1	9	165	33	115
RGVx_2019-12-04	2019	2019-12-04	RGVx	Female	C19.23	fledgling	2	F1	1	5	2	2	Handler2	1	F1	1	8	36	4	157
YORx_2019-12-04	2019	2019-12-04	YORx	Male	C19.23	fledgling	2	F1	1	3	0	0	Handler2	1	F1	1	7	25	0	138
BBYx_2019-12-04	2019	2019-12-04	BBYx	Male	C19.23	fledgling	2	F1	1	8	2	2	Handler2	1	F1	1	8	64	0	4
LbxNW_2019-12-04	2019	2019-12-04	BxNW	Male	na	adult	1	A1	1	0	0	0	Handler2	1	A1	1	6	112	0	0
YYWx_2019-12-04	2019	2019-12-04	YYWx	Male	na	adult	1	A1	1	2	3	3	Handler1	1	A1	1	6	100	9	75
NxOV_2019-12-04	2019	2019-12-04	NxOV	Female	na	adult	1	A1	1	6	2	2	Handler1	1	A1	1	9	159	11	68
GBYx_2019-12-04	2019	2019-12-04	GBYx	Female	C19.16	fledgling	2	F1	1	1	0	0	Handler1	1	F1	1	5	72	2	67
RNHx_2019-12-04	2019	2019-12-04	RNHx	Male	C19.16	fledgling	2	F1	1	3	2	2	Handler1	na	na	na	na	na	na	na
VWGx_2019-12-04	2019	2019-12-04	VWGx	Male	C19.16	fledgling	2	F1	1	1	2	2	Handler1	1	F1	1	9	110	0	72
YxWN_2019-12-04	2019	2019-12-04	YxWN	Male	C19.22	adult	1	A1	1	0	1	1	Handler2	na	na	na	na	na	na	na
YRYx_2019-12-04	2019	2019-12-04	YRYx	Male	C19.23	adult	1	A1	1	0	1	1	Handler2	na	na	na	na	na	na	na
WYGx_2019-12-04	2019	2019-12-04	WYGx	Male	C19.16	adult	1	A1	1	0	1	1	Handler2	na	na	na	na	na	na	na
HxBLb_2019-12-04	2019	2019-12-04	HxBB	Male	na	adult	1	A1	1	0	1	1	Handler2	na	na	na	na	na	na	na
LbxGW_2019-12-06	2019	2019-12-06	BxGW	Male	na	adult	1	A1	1	3	2	2	Handler3	1	A1	1	6	221	0	14
OONx_2019-12-06	2019	2019-12-06	OONx	Male	na	adult	1	A1	1	7	3	3	Handler3	1	A1	1	4	5	0	0
GYYx_2019-12-06	2019	2019-12-06	GYYx	Male	na	adult	1	A1	1	3	1	1	Handler3	1	A1	1	5	88	3	110
WYRx_2019-12-06	2019	2019-12-06	WYRx	Male	na	adult	1	A1	1	3	0	0	Handler3	1	A1	1	7	226	1	88
WNNx_2019-12-06	2019	2019-12-06	WNNx	Male	na	adult	1	A1	1	0	3	3	Handler3	1	A1	1	7	138	0	73
RWWx_2019-12-06	2019	2019-12-06	RWWx	Female	na	adult	1	A1	1	1	4	4	Handler1	1	A1	1	4	17	3	140
OHWx_2019-12-06	2019	2019-12-06	OHWx	Male	C19.20	fledgling	2	F1	1	2	0	0	Handler2	1	F1	1	4	25	0	0
VYYx_2019-12-06	2019	2019-12-06	VYYx	Female	C19.20	fledgling	2	F1	1	3	2	2	Handler2	1	F1	1	5	14	0	58
HYBx_2019-12-06	2019	2019-12-06	HYBx	Male	na	adult	1	A1	1	0	5	5	Handler1	1	A1	1	7	198	3	138
OGGx_2019-12-10	2019	2019-12-10	OGGx	Male	C19.31	nestling	1	N1	1	6	3	3.75	Handler1	na	na	na	na	na	na	na
NYNx_2019-12-10	2019	2019-12-10	NYNx	Male	C19.31	nestling	1	N1	1	8	4	5	Handler1	na	na	na	na	na	na	na
HRRx_2019-12-11	2019	2019-12-11	HRRx	Male	C19.31	nestling	1	N1	1	9	3	3.75	Handler1	na	na	na	na	na	na	na
NRRx_2019-12-13	2019	2019-12-13	NRRx	Male	na	adult	1	A1	1	2	1	1	Handler1	1	A1	1	5	69	16	41
ORHx_2019-12-13	2019	2019-12-13	ORHx	Male	na	adult	1	A1	1	2	2	2	Handler1	1	A1	1	3	3	0	0
VBNx_2019-12-13	2019	2019-12-13	VBNx	Male	na	adult	1	A1	1	1	0	0	Handler2	1	A1	1	6	172	0	60
NGNx_2019-12-13	2019	2019-12-13	NGNx	Female	na	adult	1	A1	1	0	1	1	Handler1	1	A1	1	6	154	4	72
NHRx_2019-12-16	2019	2019-12-16	NHRx	Male	na	adult	1	A1	1	0	1	1	Handler2	1	A1	1	9	57	6	125
RHWx_2019-12-16	2019	2019-12-16	RHWx	Male	C19.13	fledgling	2	F1	1	0	0	0	Handler1	2	F2	2	6	134	18	103
NVBx_2019-12-16	2019	2019-12-16	NVBx	Male	na	adult	1	A1	1	0	2	2	Handler1	1	A1	1	6	52	11	151
BVNx_2019-12-17	2019	2019-12-17	BVNx	Female	na	adult	1	A1	1	0	0	0	Handler2	1	A1	1	8	113	17	108
WVWx_2019-12-17	2019	2019-12-17	WVWx	Female	C19.03	fledgling	2	F1	1	0	0	0	Handler2	2	F2	2	5	103	0	40
YRGx_2019-12-17	2019	2019-12-17	YRGx	Male	na	adult	1	A1	1	0	0	0	Handler1	1	A1	1	7	151	12	92
OBOx_2019-12-18	2019	2019-12-18	OBOx	Female	C19.05	adult	2	A2	2	0	2	2	Handler3	1	A1	1	8	77	0	52
WNLbx_2019-12-18	2019	2019-12-18	WNLbx	Female	na	adult	1	A1	1	0	0	0	Handler3	1	A1	1	5	110	5	88
GNWx_2019-12-18	2019	2019-12-18	GNWx	Male	na	adult	1	A1	1	3	0	0	Handler3	1	A1	1	4	19	0	0
NxGB_2019-12-18	2019	2019-12-18	NxGB	Male	na	adult	1	A1	1	0	1	1	Handler1	1	A1	1	6	135	21	53
GVRx_2019-12-18	2019	2019-12-18	GVRx	Male	C19.39	nestling	1	N1	1	3	1	1.25	Handler1	na	na	na	na	na	na	na
YGVx_2019-12-19	2019	2019-12-19	YGVx	Female	na	adult	1	A1	1	0	2	2	Handler2	1	A1	1	7	138	21	112
YxBB_2019-12-19	2019	2019-12-19	YxBB	Male	na	adult	1	A1	1	2	0	0	Handler2	1	A1	1	6	187	0	30
WYVx_2019-12-19	2019	2019-12-19	WYVx	Female	C19.05	fledgling	na	na	na	na	na	na	na	2	F2	2	7	185	3	61
HGWx_2019-12-19	2019	2019-12-19	HGWx	Male	C19.05	fledgling	na	na	na	na	na	na	na	2	F2	2	4	10	19	84
VRHx_2019-12-19	2019	2019-12-19	VRHx	Female	C19.05	fledgling	na	na	na	na	na	na	na	2	F2	2	5	30	0	0
NBGx_2019-12-22	2019	2019-12-22	NBGx	Male	na	adult	1	A1	1	4	0	0	Handler2	1	A1	1	5	147	6	69
HRRx_2019-12-22	2019	2019-12-22	HRRx	Male	C19.31	fledgling	2	F1	1	12	2	2	Handler2	1	F1	1	9	138	35	123
GGVx_2019-12-22	2019	2019-12-22	GGVx	Female	na	adult	1	A1	1	2	1	1	Handler2	1	A1	1	8	161	14	56
OGGx_2019-12-22	2019	2019-12-22	OGGx	Male	C19.31	fledgling	2	F1	1	2	1	1	Handler2	1	F1	1	9	181	16	134
NYNx_2019-12-22	2019	2019-12-22	NYNx	Male	C19.31	fledgling	2	F1	1	0	0	0	Handler2	1	F1	1	6	26	0	16
GWYx_2019-12-23	2019	2019-12-23	GWYx	Male	C19.24	fledgling	2	F1	1	0	1	1	Handler3	1	F1	1	1	1	1	40
RVNx_2019-12-23	2019	2019-12-23	RVNx	Male	C19.24	fledgling	2	F1	1	3	0	0	Handler2	1	F1	1	4	25	0	5
OGWx_2019-12-23	2019	2019-12-23	OGWx	Female	C19.24	fledgling	2	F1	1	1	1	1	Handler1	1	F1	1	4	58	5	46
GYBx_2019-12-24	2019	2019-12-24	GYBx	Female	na	adult	1	A1	1	0	4	4	Handler1	1	A1	1	7	130	3	51
BRBx_2019-12-24	2019	2019-12-24	BRBx	Male	na	adult	1	A1	1	1	0	0	Handler2	1	A1	1	5	79	2	27
RBYx_2019-12-24	2019	2019-12-24	RBYx	Female	C19.13	fledgling	2	F1	1	0	1	1	Handler2	2	F2	2	6	163	2	34
YBVx_2019-12-31	2019	2019-12-31	YBVx	Female	C19.47	nestling	1	N1	1	6	3	3.75	Handler1	na	na	na	na	na	na	na
NOGx_2019-12-31	2019	2019-12-31	NOGx	Male	C19.47	nestling	1	N1	1	6	2	2.5	Handler1	na	na	na	na	na	na	na
GRYx_2019-12-31	2019	2019-12-31	GRYx	Female	C19.47	nestling	1	N1	1	3	1	1.25	Handler1	na	na	na	na	na	na	na
YWWx_2019-12-31	2019	2019-12-31	YWWx	Female	C19.49	nestling	1	N1	1	3	3	3.75	Handler1	na	na	na	na	na	na	na
VHGx_2019-12-31	2019	2019-12-31	VHGx	Male	C19.49	nestling	1	N1	1	2	2	2.5	Handler1	na	na	na	na	na	na	na
BYNx_2019-12-31	2019	2019-12-31	BYNx	Male	C19.49	nestling	1	N1	1	1	1	1.25	Handler1	na	na	na	na	na	na	na
VGLbx_2020-01-02	2019	2020-01-02	VGLbx	Male	na	adult	1	A1	1	1	1	1	Handler3	1	A1	1	7	95	0	0
WYHx_2020-01-02	2019	2020-01-02	WYHx	Female	na	adult	1	A1	1	0	1	1	Handler3	1	A1	1	5	33	2	38
ROBx_2020-01-02	2019	2020-01-02	ROBx	Male	na	adult	1	A1	1	1	0	0	Handler3	1	A1	1	6	165	17	92
HxBG_2020-01-02	2019	2020-01-02	HxBG	Male	na	adult	1	A1	1	9	3	3	Handler1	1	A1	1	3	23	0	79
WxWW_2020-09-15	2020	2020-09-15	WxWW	Female	na	adult	1	A1	1	0	1	1	Handler1	1	A1	1	10	68	2	105
HxBG_2020-09-15	2020	2020-09-15	HxBG	Male	na	adult	2	A2	2	4	2	2	Handler2	2	A2	2	8	100	0	0
OWNx_2020-09-16	2020	2020-09-16	OWNx	Female	na	adult	1	A1	1	0	1	1	Handler1	1	A1	1	2	2	0	0
WYRx_2020-09-21	2020	2020-09-21	WYRx	Male	na	adult	2	A2	2	0	2	2	Handler1	2	A2	2	6	126	0	52.5
HVNx_2020-09-21	2020	2020-09-21	HVNx	Male	na	adult	1	A1	1	1	1	1	Handler2	1	A1	1	6	102	6	119
WRNx_2020-09-21	2020	2020-09-21	WRNx	Female	na	adult	1	A1	1	5	1	1	Handler2	1	A1	1	5	27	6	93
HxBB_2020-09-21	2020	2020-09-21	HxBB	Male	na	adult	2	A2	2	4	2	2	Handler2	1	A1	1	9	108	6	84.5
HNNx_2020-09-23	2020	2020-09-23	HNNx	Female	na	adult	1	A1	1	0	2	2	Handler1	1	A1	1	6	34	1	36.5
WNLbx_2020-09-23	2020	2020-09-23	WNLbx	Female	na	adult	2	A2	2	1	0	0	Handler2	2	A2	2	6	21	11	58
WWOx_2020-09-24	2020	2020-09-24	WWOx	Male	C19.05	adult	2	A2	2	6	1	1	Handler2	1	A1	1	11	136	0	87.5
RNGx_2020-09-24	2020	2020-09-24	RNGx	Male	na	adult	1	A1	1	0	3	3	Handler2	1	A1	1	8	29	0	34.5
NxOG_2020-09-24	2020	2020-09-24	NxOG	Male	C19.05	adult	2	A2	2	0	1	1	Handler2	1	A1	1	11	160	20	61.5
VRHx_2020-09-24	2020	2020-09-24	VRHx	Female	C19.05	adult	2	A1	1	2	1	1	Handler2	3	A1	1	7	125	0	0
BRBx_2020-09-30	2020	2020-09-30	BRBx	Male	na	adult	2	A2	2	1	2	2	Handler1	2	A2	2	6	74	27	85.5
GYBx_2020-09-30	2020	2020-09-30	GYBx	Female	na	adult	2	A2	2	10	2	2	Handler2	2	A2	2	5	22	9	93.5
GGGx_2020-09-30	2020	2020-09-30	GGGx	Male	na	adult	1	A1	1	2	2	2	Handler2	1	A1	1	5	14	0	0
RRGx_2020-10-01	2020	2020-10-01	RRGx	Male	na	adult	1	A1	1	0	5	5	Handler1	1	A1	1	7	104	0	0.5
YxBB_2020-10-01	2020	2020-10-01	YxBB	Male	na	adult	2	A2	2	2	2	2	Handler2	2	A2	2	5	50	7	24.5
BNRx_2020-10-01	2020	2020-10-01	BNRx	Female	na	adult	1	A1	1	1	1	1	Handler2	1	A1	1	1	1	0	0
RYRx_2020-10-13	2020	2020-10-13	RYRx	Female	na	adult	1	A1	1	0	5	5	Handler1	1	A1	1	4	5	0	121
HVNx_2020-10-13	2020	2020-10-13	HVNx	Male	na	adult	2	A2	2	0	0	0	Handler2	2	A2	2	7	166	1	85.5
HGYx_2020-10-13	2020	2020-10-13	HGYx	Male	na	adult	1	A1	1	0	1	1	Handler2	1	A1	1	1	1	0	0
HGHx_2020-10-14	2020	2020-10-14	HGHx	Female	na	adult	1	A1	1	0	3	3	Handler1	1	A1	1	4	9	0	169.5
WONx_2020-10-15	2020	2020-10-15	WONx	Female	na	adult	1	A1	1	3	4	4	Handler1	1	A1	1	4	4	0	0
OVGx_2020-10-20	2020	2020-10-20	OVGx	Female	C20.19	nestling	1	N1	1	3	0	0	Handler1	na	na	na	na	na	na	na
NOWx_2020-10-20	2020	2020-10-20	NOWx	Male	C20.19	nestling	1	N1	1	4	1	1.25	Handler1	na	na	na	na	na	na	na
HWRx_2020-10-20	2020	2020-10-20	HWRx	Female	C20.19	nestling	1	N1	1	5	4	5	Handler1	na	na	na	na	na	na	na
LbHWx_2020-10-22	2020	2020-10-22	BHWx	Male	na	adult	2	A2	2	2	3	3	Handler1	2	A2	2	6	21	2	100
WYYx_2020-10-22	2020	2020-10-22	WYYx	Male	na	adult	2	A2	2	4	0	0	Handler2	2	A2	2	5	20	6	4.5
RRBx_2020-10-22	2020	2020-10-22	RRBx	Male	na	adult	1	A1	1	3	1	1	Handler2	1	A1	1	1	1	0	46.5
WYBx_2020-10-23	2020	2020-10-23	WYBx	Female	na	adult	1	A1	1	1	2	2	Handler1	1	A1	1	11	125	6	103
WGOx_2020-10-23	2020	2020-10-23	WGOx	Male	C19.11	adult	2	A2	2	0	3	3	Handler2	1	A1	1	10	61	24	113
NxOG_2020-10-26	2020	2020-10-26	NxOG	Male	C19.05	adult	3	A3	3	1	3	3	Handler3	2	A2	2	10	227	0	12
RNGx_2020-10-26	2020	2020-10-26	RNGx	Male	na	adult	2	A2	2	2	3	3	Handler1	2	A2	2	5	71	0	0.5
YRGx_2020-10-27	2020	2020-10-27	YRGx	Male	na	adult	2	A2	2	1	1	1	Handler1	2	A2	2	9	166	3	28.5
GBYx_2020-10-27	2020	2020-10-27	GBYx	Female	C19.16	adult	3	A1	1	6	1	1	Handler2	2	A1	1	6	199	9	76.5
YxBB_2020-10-27	2020	2020-10-27	YxBB	Male	na	adult	3	A3	3	2	1	1	Handler2	3	A3	3	10	213	0	0
OBVx_2020-10-28	2020	2020-10-28	OBVx	Female	na	adult	1	A1	1	5	3	3	Handler1	1	A1	1	11	117	6	103.5
YVNx_2020-10-28	2020	2020-10-28	YVNx	Male	na	adult	1	A1	1	0	0	0	Handler2	1	A1	1	8	165	12	118.5
WNHx_2020-10-28	2020	2020-10-28	WNHx	Male	na	adult	1	A1	1	2	3	3	Handler2	1	A1	1	11	178	40	101
GVVx_2020-11-06	2020	2020-11-06	GVVx	Female	C20.18	nestling	1	N1	1	4	3	3.75	Handler1	na	na	na	na	na	na	na
NNYx_2020-11-07	2020	2020-11-07	NNYx	Male	C20.18	nestling	1	N1	1	5	2	2.5	Handler1	na	na	na	na	na	na	na
YOOx_2020-11-07	2020	2020-11-07	YOOx	Female	C20.24	nestling	1	N1	1	5	4	5	Handler1	na	na	na	na	na	na	na
GVYx_2020-11-07	2020	2020-11-07	GVYx	Female	C20.24	nestling	1	N1	1	5	2	2.5	Handler1	na	na	na	na	na	na	na
WNGx_2020-11-08	2020	2020-11-08	WNGx	Female	C20.24	nestling	1	N1	1	4	3	3.75	Handler1	na	na	na	na	na	na	na
OWOx_2020-11-09	2020	2020-11-09	OWOx	Female	C20.07	nestling	1	N1	1	5	4	5	Handler1	na	na	na	na	na	na	na
YWGx_2020-11-10	2020	2020-11-10	YWGx	Female	C20.22	nestling	1	N1	1	4	3	3.75	Handler1	na	na	na	na	na	na	na
VRNx_2020-11-10	2020	2020-11-10	VRNx	Male	C20.14	nestling	1	N1	1	1	1	1.25	Handler1	na	na	na	na	na	na	na
BOYx_2020-11-10	2020	2020-11-10	BOYx	Male	C20.14	nestling	1	N1	1	1	1	1.25	Handler1	na	na	na	na	na	na	na
VVRx_2020-11-11	2020	2020-11-11	VVRx	Male	C20.16	nestling	1	N1	1	5	1	1.25	Handler1	na	na	na	na	na	na	na
OVYx_2020-11-11	2020	2020-11-11	OVYx	Female	C20.16	nestling	1	N1	1	2	2	2.5	Handler1	na	na	na	na	na	na	na
NNHx_2020-11-11	2020	2020-11-11	NNHx	Male	C20.16	nestling	1	N1	1	5	2	2.5	Handler1	na	na	na	na	na	na	na
YHHx_2020-11-17	2020	2020-11-17	YHHx	Female	C20.25	nestling	1	N1	1	5	3	3.75	Handler1	na	na	na	na	na	na	na
WOYx_2020-11-17	2020	2020-11-17	WOYx	Female	C20.25	nestling	1	N1	1	4	2	2.5	Handler1	na	na	na	na	na	na	na
NRWx_2020-11-17	2020	2020-11-17	NRWx	Female	C20.25	nestling	1	N1	1	3	1	1.25	Handler1	na	na	na	na	na	na	na
BxBV_2020-11-18	2020	2020-11-18	BxBV	Female	na	adult	1	A1	1	0	3	3	Handler1	1	A1	1	2	2	1	160
ONHx_2020-11-18	2020	2020-11-18	ONHx	Male	na	adult	1	A1	1	0	1	1	Handler2	1	A1	1	3	3	0	0
BxGW_2020-11-18	2020	2020-11-18	BxGW	Male	na	adult	2	A2	2	0	2	2	Handler2	2	A2	2	7	235	0	17.5
GOBx_2020-11-18	2020	2020-11-18	GOBx	Male	C20.29	nestling	1	N1	1	5	4	5	Handler1	na	na	na	na	na	na	na
HWWx_2020-11-20	2020	2020-11-20	HWWx	Female	C20.31	nestling	2	N1	1	3	2	2.5	Handler1	na	na	na	na	na	na	na
OOVx_2020-11-20	2020	2020-11-20	OOVx	Female	C20.28	nestling	2	N1	1	5	3	3.75	Handler1	na	na	na	na	na	na	na
NGRx_2020-11-20	2020	2020-11-20	NGRx	Female	C20.29	nestling	2	N1	1	2	2	2.5	Handler1	na	na	na	na	na	na	na
BYRx_2020-11-20	2020	2020-11-20	BYRx	Female	C20.29	nestling	2	N1	1	4	3	3.75	Handler1	na	na	na	na	na	na	na
YVBx_2020-11-25	2020	2020-11-25	YVBx	Female	C20.37	nestling	1	N1	1	2	2	2.5	Handler1	na	na	na	na	na	na	na
GOOx_2020-11-25	2020	2020-11-25	GOOx	Male	C20.37	nestling	1	N1	1	6	3	3.75	Handler1	na	na	na	na	na	na	na
GVYx_2020-11-26	2020	2020-11-26	GVYx	Female	C20.24	fledgling	2	F1	1	0	0	0	Handler2	1	F1	1	9	238	22	130
WNGx_2020-11-26	2020	2020-11-26	WNGx	Female	C20.24	fledgling	2	F1	1	0	1	1	Handler2	1	F1	1	5	26	11	88.5
YOOx_2020-11-26	2020	2020-11-26	YOOx	Female	C20.24	fledgling	2	F1	1	0	1	1	Handler2	1	F1	1	9	50	0	14
VRHx_2020-11-26	2020	2020-11-26	VRHx	Female	C19.05	adult	3	A2	2	3	1	1	Handler2	4	A2	2	9	58	0	10
RGYx_2020-11-26	2020	2020-11-26	RGYx	Male	C20.33	nestling	1	N1	1	1	0	0	Handler1	na	na	na	na	na	na	na
HOGx_2020-11-26	2020	2020-11-26	HOGx	Female	C20.33	nestling	1	N1	1	1	0	0	Handler1	na	na	na	na	na	na	na
VYBx_2020-11-29	2020	2020-11-29	VYBx	Female	C20.40	nestling	1	N1	1	1	1	1.25	Handler1	na	na	na	na	na	na	na
NHNx_2020-11-29	2020	2020-11-29	NHNx	Female	C20.40	nestling	1	N1	1	1	3	3.75	Handler1	na	na	na	na	na	na	na
NBOx_2020-11-29	2020	2020-11-29	NBOx	Female	C20.34	nestling	1	N1	1	4	2	2.5	Handler1	na	na	na	na	na	na	na
BWWx_2020-11-29	2020	2020-11-29	BWWx	Female	C20.34	nestling	1	N1	1	3	3	3.75	Handler1	na	na	na	na	na	na	na
YNBx_2020-11-30	2020	2020-11-30	YNBx	Female	C20.38	nestling	1	N1	1	4	4	5	Handler1	na	na	na	na	na	na	na
ROOx_2020-11-30	2020	2020-11-30	ROOx	Male	C20.38	nestling	1	N1	1	2	3	3.75	Handler1	na	na	na	na	na	na	na
HVWx_2020-11-30	2020	2020-11-30	HVWx	Male	C20.38	nestling	1	N1	1	7	3	3.75	Handler1	na	na	na	na	na	na	na
YORx_2020-12-02	2020	2020-12-02	YORx	Male	C19.23	adult	3	A1	1	3	2	2	Handler2	2	A1	1	5	154	7	138
YRYx_2020-12-02	2020	2020-12-02	YRYx	Male	C19.23	adult	2	A2	2	1	0	0	Handler2	na	na	na	na	na	na	na
RGVx_2020-12-02	2020	2020-12-02	RGVx	Female	C19.23	adult	3	A1	1	1	1	1	Handler2	2	A1	1	7	87	12	141
OWOx_2020-12-02	2020	2020-12-02	OWOx	Female	C20.07	fledgling	2	F1	1	3	1	1	Handler2	1	F1	1	6	120	12	155.5
BxNW_2020-12-02	2020	2020-12-02	BxNW	Male	na	adult	2	A2	2	0	3	3	Handler2	2	A2	2	4	5	0	0
BBYx_2020-12-02	2020	2020-12-02	BBYx	Male	C19.23	adult	3	A1	1	9	0	0	Handler2	2	A1	1	7	198	3	68
YYWx_2020-12-02	2020	2020-12-02	YYWx	Male	na	adult	2	A2	2	2	1	1	Handler2	2	A2	2	7	226	22	118
VNVx_2020-12-02	2020	2020-12-02	VNVx	Female	na	adult	1	A1	1	0	0	0	Handler2	1	A1	1	5	136	2	91
BOYx_2020-12-02	2020	2020-12-02	BOYx	Male	C20.14	fledgling	2	F1	1	2	1	1	Handler2	1	F1	1	8	211	25	136
NRRx_2020-12-02	2020	2020-12-02	NRRx	Male	na	adult	2	A2	2	4	2	2	Handler2	2	A2	2	7	92	0	2
WYGx_2020-12-02	2020	2020-12-02	WYGx	Male	C19.16	adult	2	A2	2	3	0	0	Handler2	1	A1	1	8	153	7	68
HxBB_2020-12-02	2020	2020-12-02	HxBB	Male	na	adult	3	A3	3	0	0	0	Handler2	2	A2	2	6	199	3	0.5
NNHx_2020-12-03	2020	2020-12-03	NNHx	Male	C20.16	fledgling	2	F1	1	0	0	0	Handler2	1	F1	1	6	158	15	153
VVRx_2020-12-03	2020	2020-12-03	VVRx	Male	C20.16	fledgling	2	F1	1	0	0	0	Handler2	1	F1	1	7	127	13	123
ROBx_2020-12-03	2020	2020-12-03	ROBx	Male	na	adult	2	A2	2	0	0	0	Handler2	2	A2	2	7	137	3	74.5
VGLbx_2020-12-03	2020	2020-12-03	VGLbx	Male	na	adult	2	A2	2	0	2	2	Handler2	2	A2	2	7	213	8	133
WYHx_2020-12-03	2020	2020-12-03	WYHx	Female	na	adult	2	A2	2	0	0	0	Handler2	2	A2	2	5	55	8	98
OVYx_2020-12-03	2020	2020-12-03	OVYx	Female	C20.16	fledgling	2	F1	1	0	1	1	Handler2	1	F1	1	7	201	21	131
NxBR_2020-12-04	2020	2020-12-04	NxBR	Female	na	adult	1	A1	1	2	3	3	Handler2	na	na	na	na	na	na	na
NOVx_2020-12-04	2020	2020-12-04	NOVx	Male	na	adult	1	A1	1	3	1	1	Handler2	1	A1	1	8	72	2	22.5
YWGx_2020-12-04	2020	2020-12-04	YWGx	Female	C20.22	fledgling	2	F1	1	0	1	1	Handler1	1	F1	1	6	155	5	151
YBRx_2020-12-06	2020	2020-12-06	YBRx	Female	C20.36	nestling	1	N1	1	4	3	3.75	Handler1	na	na	na	na	na	na	na
VNNx_2020-12-06	2020	2020-12-06	VNNx	Male	C20.36	nestling	1	N1	1	1	4	5	Handler1	na	na	na	na	na	na	na
HRGx_2020-12-06	2020	2020-12-06	HRGx	Female	C20.36	nestling	1	N1	1	6	2	2.5	Handler1	na	na	na	na	na	na	na
NGNx_2020-12-08	2020	2020-12-08	NGNx	Female	na	adult	2	A2	2	2	2	2	Handler1	2	A2	2	6	183	3	8
BYNx_2020-12-08	2020	2020-12-08	BYNx	Male	C19.49	adult	2	A1	1	0	0	0	Handler2	1	A1	1	7	195	0	5
YHHx_2020-12-08	2020	2020-12-08	YHHx	Female	C20.25	fledgling	2	F1	1	0	0	0	Handler2	1	F1	1	8	262	14	80.5
NRWx_2020-12-08	2020	2020-12-08	NRWx	Female	C20.25	fledgling	2	F1	1	0	0	0	Handler2	1	F1	1	6	230	6	58
RRBx_2020-12-09	2020	2020-12-09	RRBx	Male	na	adult	2	A2	2	3	5	5	Handler1	2	A2	2	2	3	0	45
VGRx_2020-12-11	2020	2020-12-11	VGRx	Male	C20.43	nestling	1	N1	1	6	1	1.25	Handler1	na	na	na	na	na	na	na
NONx_2020-12-11	2020	2020-12-11	NONx	Female	C20.43	nestling	1	N1	1	4	2	2.5	Handler1	na	na	na	na	na	na	na
WHBx_2020-12-12	2020	2020-12-12	WHBx	Male	C20.43	nestling	1	N1	1	5	3	3.75	Handler1	na	na	na	na	na	na	na
VONx_2020-12-12	2020	2020-12-12	VONx	Male	C20.45	nestling	1	N1	1	3	1	1.25	Handler1	na	na	na	na	na	na	na
RNRx_2020-12-12	2020	2020-12-12	RNRx	Female	C20.45	nestling	1	N1	1	5	2	2.5	Handler1	na	na	na	na	na	na	na
BHGx_2020-12-12	2020	2020-12-12	BHGx	Male	C20.45	nestling	1	N1	1	6	2	2.5	Handler1	na	na	na	na	na	na	na
GNWx_2020-12-14	2020	2020-12-14	GNWx	Male	na	adult	2	A2	2	2	1	1	Handler2	2	A2	2	5	52	0	15.5
YRVx_2020-12-14	2020	2020-12-14	YRVx	Female	na	fledgling	1	F1	1	0	0	0	Handler2	1	F1	1	8	55	3	124
BGBx_2020-12-14	2020	2020-12-14	BGBx	Female	na	fledgling	1	F1	1	0	0	0	Handler2	1	F1	1	7	138	3	91.5
WNLbx_2020-12-14	2020	2020-12-14	WNLbx	Female	na	adult	3	A3	3	1	0	0	Handler2	3	A3	3	1	1	1	66
GOOx_2020-12-15	2020	2020-12-15	GOOx	Male	C20.37	fledgling	2	F1	1	9	1	1	Handler2	1	F1	1	7	220	16	120
RNHx_2020-12-15	2020	2020-12-15	RNHx	Male	C19.16	adult	3	A1	1	5	4	4	Handler2	2	A1	1	7	182	0	67
HVWx_2020-12-15	2020	2020-12-15	HVWx	Male	C20.38	fledgling	2	F1	1	1	1	1	Handler2	1	F1	1	10	115	8	49.5
YNBx_2020-12-15	2020	2020-12-15	YNBx	Female	C20.38	fledgling	2	F1	1	1	1	1	Handler2	1	F1	1	7	100	22	138.5
ROOx_2020-12-15	2020	2020-12-15	ROOx	Male	C20.38	fledgling	2	F1	1	0	3	3	Handler2	1	F1	1	6	52	0	15
YGVx_2020-12-15	2020	2020-12-15	YGVx	Female	na	adult	2	A2	2	0	0	0	Handler2	2	A2	2	10	91	1	53
NVHx_2020-12-15	2020	2020-12-15	NVHx	Female	C19.11	adult	2	A2	2	0	1	1	Handler2	1	A1	1	7	169	2	9.5
YVBx_2020-12-15	2020	2020-12-15	YVBx	Female	C20.37	fledgling	2	F1	1	3	1	1	Handler2	1	F1	1	7	84	23	146.5
GBHx_2020-12-15	2020	2020-12-15	GBHx	Male	na	adult	1	A1	1	7	2	2	Handler2	1	A1	1	7	45	3	36.5
BRBx_2020-12-16	2020	2020-12-16	BRBx	Male	na	adult	3	A3	3	0	0	0	Handler2	3	A3	3	7	194	0	3.5
WONx_2020-12-16	2020	2020-12-16	WONx	Female	na	adult	2	A2	2	0	1	1	Handler2	2	A2	2	9	83	0	2.5
GWVx_2020-12-16	2020	2020-12-16	GWVx	Female	na	adult	1	A1	1	4	4	4	Handler2	1	A1	1	5	162	3	124.5
NRHx_2020-12-16	2020	2020-12-16	NRHx	Female	na	fledgling	1	F1	1	0	0	0	Handler2	1	F1	1	6	278	0	89
YBBx_2020-12-16	2020	2020-12-16	YBBx	Female	na	fledgling	1	F1	1	8	0	0	Handler2	1	F1	1	6	203	1	66
VOYx_2020-12-16	2020	2020-12-16	VOYx	Male	na	adult	1	A1	1	0	0	0	Handler2	1	A1	1	4	6	0	12
NHNx_2020-12-18	2020	2020-12-18	NHNx	Female	C20.40	fledgling	2	F1	1	1	1	1	Handler2	1	F1	1	5	49	1	72.5
WYRx_2020-12-18	2020	2020-12-18	WYRx	Male	na	adult	3	A3	3	2	2	2	Handler2	3	A3	3	6	138	3	158.5
NOGx_2020-12-18	2020	2020-12-18	NOGx	Male	C19.47	adult	2	A1	1	0	1	1	Handler2	1	A1	1	7	165	8	44.5
VYBx_2020-12-18	2020	2020-12-18	VYBx	Female	C20.40	fledgling	2	F1	1	2	1	1	Handler2	1	F1	1	5	31	5	104.5
HGYx_2020-12-18	2020	2020-12-18	HGYx	Male	na	adult	2	A2	2	0	1	1	Handler2	2	A2	2	3	3	0	0
LbVNx_2020-12-18	2020	2020-12-18	LbVNx	Female	na	adult	1	A1	1	2	5	5	Handler2	1	A1	1	5	8	1	120
HVNx_2020-12-18	2020	2020-12-18	HVNx	Male	na	adult	3	A3	3	1	1	1	Handler2	3	A3	3	4	4	0	79
RVHx_2020-12-20	2020	2020-12-20	RVHx	Male	C20.56	nestling	1	N1	1	4	4	5	Handler1	na	na	na	na	na	na	na
HWBx_2020-12-20	2020	2020-12-20	HWBx	Male	C20.56	nestling	1	N1	1	4	4	5	Handler1	na	na	na	na	na	na	na
GHOx_2020-12-20	2020	2020-12-20	GHOx	Female	C20.49	nestling	1	N1	1	3	3	3.75	Handler1	na	na	na	na	na	na	na
NVRx_2020-12-20	2020	2020-12-20	NVRx	Female	C20.47	nestling	1	N1	1	2	2	2.5	Handler1	na	na	na	na	na	na	na
HRYx_2020-12-20	2020	2020-12-20	HRYx	Male	C20.47	nestling	1	N1	1	3	3	3.75	Handler1	na	na	na	na	na	na	na
GOWx_2020-12-20	2020	2020-12-20	GOWx	Female	C20.47	nestling	1	N1	1	4	4	5	Handler1	na	na	na	na	na	na	na
VWVx_2020-12-21	2020	2020-12-21	VWVx	Male	C20.49	nestling	1	N1	1	4	4	5	Handler1	na	na	na	na	na	na	na
OYHx_2020-12-21	2020	2020-12-21	OYHx	Female	C20.46	nestling	1	N1	1	2	3	3.75	Handler1	na	na	na	na	na	na	na
GWGx_2020-12-21	2020	2020-12-21	GWGx	Female	C20.46	nestling	1	N1	1	4	4	5	Handler1	na	na	na	na	na	na	na
BYRx_2020-12-22	2020	2020-12-22	BYRx	Female	C20.29	fledgling	3	F1	1	0	1	1	Handler2	1	F1	1	6	82	1	45
NGRx_2020-12-22	2020	2020-12-22	NGRx	Female	C20.29	fledgling	3	F1	1	0	0	0	Handler2	1	F1	1	7	113	12	99
BOYx_2020-12-22	2020	2020-12-22	BOYx	Male	C20.14	fledgling	3	F2	2	5	4	4	Handler2	2	F2	2	6	173	2	165.5
NRRx_2020-12-22	2020	2020-12-22	NRRx	Male	na	adult	3	A3	3	7	5	5	Handler2	3	A3	3	8	60	0	0
YxNN_2020-12-22	2020	2020-12-22	YxNN	Male	na	adult	1	A1	1	8	4	4	Handler2	1	A1	1	4	5	0	0
YNHx_2020-12-22	2020	2020-12-22	YNHx	Male	C20.50	nestling	1	N1	1	6	2	2.5	Handler1	na	na	na	na	na	na	na
RVRx_2020-12-22	2020	2020-12-22	RVRx	Female	C20.50	nestling	1	N1	1	9	3	3.75	Handler1	na	na	na	na	na	na	na
VBRx_2020-12-22	2020	2020-12-22	VBRx	Male	C20.46	nestling	1	N1	1	4	4	5	Handler1	na	na	na	na	na	na	na
YBRx_2020-12-24	2020	2020-12-24	YBRx	Female	C20.36	fledgling	2	F1	1	0	0	0	Handler2	1	F1	1	7	150	20	152.5
HRGx_2020-12-24	2020	2020-12-24	HRGx	Female	C20.36	fledgling	2	F1	1	0	1	1	Handler2	1	F1	1	7	13	0	75
VNNx_2020-12-24	2020	2020-12-24	VNNx	Male	C20.36	fledgling	2	F1	1	1	0	0	Handler2	1	F1	1	8	122	13	109.5
WNNx_2020-12-24	2020	2020-12-24	WNNx	Male	na	adult	2	A2	2	0	2	2	Handler2	2	A2	2	7	122	0	64.5
OWNx_2020-12-24	2020	2020-12-24	OWNx	Female	na	adult	2	A2	2	0	0	0	Handler2	2	A2	2	12	201	11	112.5
BxBB_2020-12-24	2020	2020-12-24	BxBB	Male	na	adult	1	A1	1	4	4	4	Handler2	1	A1	1	6	123	0	159
NHRx_2020-12-28	2020	2020-12-28	NHRx	Male	na	adult	2	A2	2	0	2	2	Handler1	2	A2	2	4	12	0	49.5
YRBx_2020-12-28	2020	2020-12-28	YRBx	Male	C20.52	nestling	1	N1	1	7	2	2.5	Handler1	na	na	na	na	na	na	na
GVWx_2020-12-28	2020	2020-12-28	GVWx	Male	C20.52	nestling	1	N1	1	3	1	1.25	Handler1	na	na	na	na	na	na	na
Wxzz_2020-12-29	2020	2020-12-29	Wxzz	Female	C19.22	adult	2	A1	1	0	2	2	Handler1	1	A1	1	5	114	9	101
WYBx_2020-12-29	2020	2020-12-29	WYBx	Female	na	adult	2	A2	2	0	0	0	Handler2	2	A2	2	6	194	5	30.5
VONx_2020-12-29	2020	2020-12-29	VONx	Male	C20.45	fledgling	2	F1	1	0	0	0	Handler2	1	F1	1	7	123	1	68
WGOx_2020-12-29	2020	2020-12-29	WGOx	Male	C19.11	adult	3	A3	3	2	2	2	Handler2	2	A2	2	6	72	0	85.5
RNRx_2020-12-29	2020	2020-12-29	RNRx	Female	C20.45	fledgling	2	F1	1	0	1	1	Handler2	1	F1	1	7	149	5	80
GGGx_2021-01-09	2020	2021-01-09	GGGx	Male	na	adult	2	A2	2	0	2	2	Handler1	2	A2	2	3	3	6	40.5
RVRx_2021-01-09	2020	2021-01-09	RVRx	Female	C20.50	fledgling	2	F1	1	0	0	0	Handler1	1	F1	1	5	135	1	84
GYBx_2021-01-09	2020	2021-01-09	GYBx	Female	na	adult	3	A3	3	0	1	1	Handler1	3	A3	3	5	40	3	38
VHYx_2021-01-09	2020	2021-01-09	VHYx	Female	C20.57	nestling	1	N1	1	4	4	5	Handler1	na	na	na	na	na	na	na
OROx_2021-01-09	2020	2021-01-09	OROx	Female	C20.57	nestling	1	N1	1	4	2	2.5	Handler1	na	na	na	na	na	na	na
GNGx_2021-01-09	2020	2021-01-09	GNGx	Female	C20.57	nestling	1	N1	1	3	4	5	Handler1	na	na	na	na	na	na	na
BWWx_2021-01-14	2020	2021-01-14	BWWx	Female	C20.34	fledgling	2	F1	1	0	3	3	Handler1	1	F1	1	7	79	3	142.5
NBOx_2021-01-14	2020	2021-01-14	NBOx	Female	C20.34	fledgling	2	F1	1	0	0	0	Handler1	1	F1	1	9	190	5	120
WNRx_2021-01-14	2020	2021-01-14	WNRx	Male	C20.59	nestling	1	N1	1	4	2	2.5	Handler1	na	na	na	na	na	na	na
OWWx_2021-01-14	2020	2021-01-14	OWWx	Female	C20.59	nestling	1	N1	1	4	3	3.75	Handler1	na	na	na	na	na	na	na
GYGx_2021-01-14	2020	2021-01-14	GYGx	Male	C20.59	nestling	1	N1	1	2	3	3.75	Handler1	na	na	na	na	na	na	na
GOWx_2021-01-15	2020	2021-01-15	GOWx	Female	C20.47	fledgling	2	F1	1	0	0	0	Handler2	1	F1	1	7	138	20	131.5
BNRx_2021-01-15	2020	2021-01-15	BNRx	Female	na	adult	2	A2	2	2	2	2	Handler2	2	A2	2	3	3	0	0
OOBx_2021-01-15	2020	2021-01-15	OOBx	Male	C20.58	nestling	1	N1	1	4	3	3.75	Handler1	na	na	na	na	na	na	na
HGVx_2021-01-15	2020	2021-01-15	HGVx	Male	C20.58	nestling	1	N1	1	4	2	2.5	Handler1	na	na	na	na	na	na	na
OWOx_2021-01-16	2020	2021-01-16	OWOx	Female	C20.07	fledgling	3	F2	2	2	0	0	Handler2	2	F2	2	5	21	3	136
RVHx_2021-01-16	2020	2021-01-16	RVHx	Male	C20.56	fledgling	2	F1	1	9	1	1	Handler2	1	F1	1	8	227	11	91.5
HWBx_2021-01-16	2020	2021-01-16	HWBx	Male	C20.56	fledgling	2	F1	1	10	1	1	Handler2	1	F1	1	7	180	25	134
HxWH_2021-01-16	2020	2021-01-16	HxWH	Female	na	adult	2	A2	2	3	1	1	Handler2	2	A2	2	10	129	21	132.5
HRYx_2021-01-16	2020	2021-01-16	HRYx	Male	C20.47	fledgling	2	F1	1	0	1	1	Handler1	1	F1	1	7	101	8	72
GWGx_2021-01-20	2020	2021-01-20	GWGx	Female	C20.46	fledgling	2	F1	1	0	2	2	Handler1	1	F1	1	6	96	3	83.5
YRGx_2021-01-20	2020	2021-01-20	YRGx	Male	na	adult	3	A3	3	1	0	0	Handler1	3	A3	3	9	158	0	11
VWVx_2021-01-22	2020	2021-01-22	VWVx	Male	C20.49	fledgling	2	F1	1	1	1	1	Handler2	1	F1	1	8	234	23	107.5
GHOx_2021-01-22	2020	2021-01-22	GHOx	Female	C20.49	fledgling	2	F1	1	0	1	1	Handler2	1	F1	1	6	124	1	61
WRNx_2021-01-22	2020	2021-01-22	WRNx	Female	na	adult	2	A2	2	0	1	1	Handler2	2	A2	2	4	15	5	84
HxBB_2021-01-22	2020	2021-01-22	HxBB	Male	na	adult	4	A4	4	0	0	0	Handler2	3	A3	3	5	99	0	1
YNYx_2021-01-22	2020	2021-01-22	YNYx	Female	na	fledgling	1	F1	1	0	2	2	Handler2	1	F1	1	6	35	8	140.5
OYHx_2021-01-29	2020	2021-01-29	OYHx	Female	C20.46	fledgling	2	F1	1	0	2	2	Handler2	1	F1	1	7	92	15	91.5
YRVx_2021-01-29	2020	2021-01-29	YRVx	Female	na	fledgling	2	F2	2	0	1	1	Handler2	2	F2	2	8	186	0	25
VBRx_2021-01-29	2020	2021-01-29	VBRx	Male	C20.46	fledgling	2	F1	1	3	0	0	Handler2	1	F1	1	6	151	24	103
WYYx_2021-01-30	2020	2021-01-30	WYYx	Male	na	adult	3	A3	3	3	0	0	Handler2	3	A3	3	6	37	3	1
YxNN_2021-01-30	2020	2021-01-30	YxNN	Male	na	adult	2	A2	2	4	3	3	Handler2	2	A2	2	3	5	0	0
RGRx_2021-01-30	2020	2021-01-30	RGRx	Male	na	adult	1	A1	1	4	4	4	Handler2	1	A1	1	4	5	0	0
GNGx_2021-01-30	2020	2021-01-30	GNGx	Female	C20.57	fledgling	2	F1	1	0	0	0	Handler2	1	F1	1	8	207	103	78
VHYx_2021-01-30	2020	2021-01-30	VHYx	Female	C20.57	fledgling	2	F1	1	0	1	1	Handler2	1	F1	1	7	179	21	145
WxWW_2021-01-30	2020	2021-01-30	WxWW	Female	na	adult	2	A2	2	0	1	1	Handler2	2	A2	2	11	268	62	19.5
VGRx_2021-02-01	2020	2021-02-01	VGRx	Male	C20.43	fledgling	2	F1	1	1	2	2	Handler2	1	F1	1	2	2	0	92
NONx_2021-02-01	2020	2021-02-01	NONx	Female	C20.43	fledgling	2	F1	1	1	2	2	Handler2	1	F1	1	7	149	3	64
WHBx_2021-02-01	2020	2021-02-01	WHBx	Male	C20.43	fledgling	2	F1	1	2	2	2	Handler2	1	F1	1	7	130	6	126.5
YVGx_2021-02-01	2020	2021-02-01	YVGx	Male	C20.61	nestling	1	N1	1	5	3	3.75	Handler1	na	na	na	na	na	na	na
ORNx_2021-02-01	2020	2021-02-01	ORNx	Male	C20.61	nestling	1	N1	1	4	3	3.75	Handler1	na	na	na	na	na	na	na
ROOx_2021-02-12	2020	2021-02-12	ROOx	Male	C20.38	fledgling	3	F2	2	4	2	2	Handler2	2	F2	2	6	50	4	78
GOOx_2021-02-12	2020	2021-02-12	GOOx	Male	C20.37	fledgling	3	F2	2	5	2	2	Handler2	2	F2	2	7	225	13	81.5
YNBx_2021-02-12	2020	2021-02-12	YNBx	Female	C20.38	fledgling	3	F2	2	0	1	1	Handler2	2	F2	2	3	3	23	113.5
WNRx_2021-02-12	2020	2021-02-12	WNRx	Male	C20.59	fledgling	2	F1	1	1	0	0	Handler2	1	F1	1	5	111	11	157.5
YGVx_2021-02-12	2020	2021-02-12	YGVx	Female	na	adult	3	A3	3	0	1	1	Handler2	3	A3	3	8	83	0	31
GYGx_2021-02-12	2020	2021-02-12	GYGx	Male	C20.59	fledgling	2	F1	1	0	0	0	Handler2	1	F1	1	8	163	11	131
GBHx_2021-02-12	2020	2021-02-12	GBHx	Male	na	adult	2	A2	2	5	3	3	Handler2	2	A2	2	8	157	0	38
RRVx_2021-02-12	2020	2021-02-12	RRVx	Female	na	fledgling	1	F1	1	0	3	3	Handler2	1	F1	1	1	1	0	104
HWBx_2021-09-10	2021	2021-09-10	HWBx	Male	C20.56	adult	3	A1	1	6	4	4	Handler1	2	A1	1	6	199	5	117
NHNx_2021-09-21	2021	2021-09-21	NHNx	Female	C20.40	adult	3	A1	1	1	2	2	Handler3	2	A1	1	6	72	3	107.5
VNNx_2021-09-21	2021	2021-09-21	VNNx	Male	C20.36	adult	3	A1	1	3	3	3	Handler3	2	A1	1	7	172	0	64.5
OWOx_2021-09-21	2021	2021-09-21	OWOx	Female	C20.07	adult	4	A1	1	14	3	3	Handler3	3	A1	1	8	272	0	0
WNGx_2021-09-28	2021	2021-09-28	WNGx	Female	C20.24	adult	3	A1	1	0	1	1	Handler1	2	A1	1	7	189	12	87.5
YVNx_2021-10-06	2021	2021-10-06	YVNx	Male	na	adult	2	A2	2	0	1	1	Handler1	2	A2	2	6	146	5	98
GOWx_2021-10-06	2021	2021-10-06	GOWx	Female	C20.47	adult	3	A1	1	5	0	0	Handler1	2	A1	1	6	204	1	70
YVGx_2021-10-18	2021	2021-10-18	YVGx	Male	C20.61	adult	2	A1	1	0	3	3	Handler3	1	A1	1	3	5	0	4.5
NONx_2021-10-18	2021	2021-10-18	NONx	Female	C20.43	adult	3	A1	1	1	1	1	Handler3	2	A1	1	7	143	1	55.5
ORNx_2021-10-18	2021	2021-10-18	ORNx	Male	C20.61	adult	2	A1	1	1	0	0	Handler3	1	A1	1	1	1	0	0
NRRx_2021-10-18	2021	2021-10-18	NRRx	Male	na	adult	4	A4	4	2	2	2	Handler3	na	na	na	na	na	na	na
BOYx_2021-10-18	2021	2021-10-18	BOYx	Male	C20.14	adult	4	A1	1	3	5	5	Handler1	3	A1	1	7	66	0	0.5
BOVx_2021-11-02	2021	2021-11-02	BOVx	Unknown	C21.02	nestling	1	N1	1	5	3	3.75	Handler1	na	na	na	na	na	na	na
GBWx_2021-11-09	2021	2021-11-09	GBWx	Unknown	C21.05	nestling	1	N1	1	4	1	1.25	Handler1	na	na	na	na	na	na	na
WYNx_2021-11-09	2021	2021-11-09	WYNx	Unknown	C21.05	nestling	1	N1	1	7	4	5	Handler1	na	na	na	na	na	na	na
HVVx_2021-11-09	2021	2021-11-09	HVVx	Unknown	C21.05	nestling	1	N1	1	5	2	2.5	Handler1	na	na	na	na	na	na	na
VNBx_2021-11-26	2021	2021-11-26	VNBx	Male	C21.13	nestling	1	N1	1	5	4	5	Handler1	na	na	na	na	na	na	na
HBRx_2021-11-26	2021	2021-11-26	HBRx	Male	C21.13	nestling	1	N1	1	4	3	3.75	Handler1	na	na	na	na	na	na	na
GROx_2021-11-26	2021	2021-11-26	GROx	Unknown	C21.13	nestling	1	N1	1	0	0	0	Handler1	na	na	na	na	na	na	na
WVBx_2021-11-26	2021	2021-11-26	WVBx	Unknown	C21.06	nestling	1	N1	1	3	3	3.75	Handler1	na	na	na	na	na	na	na
OHOx_2021-11-26	2021	2021-11-26	OHOx	Female	C21.06	nestling	1	N1	1	6	3	3.75	Handler1	na	na	na	na	na	na	na
GYNx_2021-11-26	2021	2021-11-26	GYNx	Unknown	C21.06	nestling	1	N1	1	5	2	2.5	Handler1	na	na	na	na	na	na	na
YWRx_2021-11-27	2021	2021-11-27	YWRx	Male	na	adult	1	A1	1	0	4	4	Handler1	1	A1	1	8	196	0	112
YBGx_2021-12-02	2021	2021-12-02	YBGx	Unknown	C21.09	nestling	1	N1	1	5	4	5	Handler1	na	na	na	na	na	na	na
VWNx_2021-12-02	2021	2021-12-02	VWNx	Unknown	C21.09	nestling	1	N1	1	2	3	3.75	Handler1	na	na	na	na	na	na	na
BHBx_2021-12-02	2021	2021-12-02	BHBx	Unknown	C21.16	nestling	1	N1	1	6	3	3.75	Handler1	na	na	na	na	na	na	na
YOBx_2021-12-02	2021	2021-12-02	YOBx	Unknown	C21.16	nestling	1	N1	1	6	3	3.75	Handler1	na	na	na	na	na	na	na
GHWx_2021-12-02	2021	2021-12-02	GHWx	Unknown	C21.16	nestling	1	N1	1	5	3	3.75	Handler1	na	na	na	na	na	na	na
NOYx_2021-12-10	2021	2021-12-10	NOYx	Unknown	C21.17	nestling	1	N1	1	1	2	2.5	Handler1	na	na	na	na	na	na	na
YRRx_2021-12-10	2021	2021-12-10	YRRx	Male	C21.17	nestling	1	N1	1	7	4	5	Handler1	na	na	na	na	na	na	na
GBNx_2021-12-10	2021	2021-12-10	GBNx	Unknown	C21.17	nestling	1	N1	1	3	2	2.5	Handler1	na	na	na	na	na	na	na
WNWx_2021-12-10	2021	2021-12-10	WNWx	Female	C21.15	nestling	1	N1	1	4	2	2.5	Handler1	na	na	na	na	na	na	na
BNNx_2021-12-10	2021	2021-12-10	BNNx	Unknown	C21.15	nestling	1	N1	1	4	2	2.5	Handler1	na	na	na	na	na	na	na
VRVx_2021-12-10	2021	2021-12-10	VRVx	Female	C21.15	nestling	1	N1	1	6	3	3.75	Handler1	na	na	na	na	na	na	na
BOWx_2021-12-14	2021	2021-12-14	BOWx	Unknown	C21.14	nestling	1	N1	1	4	4	5	Handler1	na	na	na	na	na	na	na
GYHx_2021-12-14	2021	2021-12-14	GYHx	Unknown	C21.14	nestling	1	N1	1	3	3	3.75	Handler1	na	na	na	na	na	na	na
RWRx_2021-12-14	2021	2021-12-14	RWRx	Unknown	C21.14	nestling	1	N1	1	5	4	5	Handler1	na	na	na	na	na	na	na
HYOx_2021-12-14	2021	2021-12-14	HYOx	Male	C21.26	nestling	1	N1	1	5	4	5	Handler1	na	na	na	na	na	na	na
BVRx_2021-12-14	2021	2021-12-14	BVRx	Unknown	C21.26	nestling	1	N1	1	2	3	3.75	Handler1	na	na	na	na	na	na	na
NYOx_2021-12-15	2021	2021-12-15	NYOx	Unknown	C21.23	nestling	1	N1	1	3	3	3.75	Handler1	na	na	na	na	na	na	na
OBGx_2021-12-15	2021	2021-12-15	OBGx	Unknown	C21.23	nestling	1	N1	1	5	4	5	Handler1	na	na	na	na	na	na	na
BHRx_2021-12-18	2021	2021-12-18	BHRx	Male	C21.30	nestling	1	N1	1	2	0	0	Handler1	na	na	na	na	na	na	na
YWVx_2021-12-18	2021	2021-12-18	YWVx	Unknown	C21.30	nestling	1	N1	1	6	3	3.75	Handler1	na	na	na	na	na	na	na
OVBx_2021-12-18	2021	2021-12-18	OVBx	Unknown	C21.30	nestling	1	N1	1	1	2	2.5	Handler1	na	na	na	na	na	na	na
NxOG_2021-12-21	2021	2021-12-21	NxOG	Male	C19.05	adult	4	A4	4	0	1	1	Handler4	na	na	na	na	na	na	na
WWOx_2021-12-21	2021	2021-12-21	WWOx	Male	C19.05	adult	3	A3	3	1	0	0	Handler4	na	na	na	na	na	na	na
VNBx_2021-12-21	2021	2021-12-21	VNBx	Male	C21.13	fledgling	2	F1	1	2	4	4	Handler1	1	F1	1	8	117	21	136
HBRx_2021-12-21	2021	2021-12-21	HBRx	Male	C21.13	fledgling	2	F1	1	0	1	1	Handler1	1	F1	1	8	23	0	157.5
BVGx_2021-12-28	2021	2021-12-28	BVGx	Unknown	C21.37	nestling	1	N1	1	4	3	3.75	Handler4	na	na	na	na	na	na	na
HWNx_2021-12-28	2021	2021-12-28	HWNx	Male	C21.25	nestling	1	N1	1	5	4	5	Handler4	na	na	na	na	na	na	na
VHWx_2021-12-28	2021	2021-12-28	VHWx	Male	C21.25	nestling	1	N1	1	5	4	5	Handler4	na	na	na	na	na	na	na
NBYx_2021-12-28	2021	2021-12-28	NBYx	Female	C21.25	nestling	1	N1	1	6	4	5	Handler4	na	na	na	na	na	na	na
OGVx_2022-01-08	2021	2022-01-08	OGVx	Unknown	C21.31	nestling	1	N1	1	1	2	2.5	Handler1	na	na	na	na	na	na	na
WBYx_2022-01-08	2021	2022-01-08	WBYx	Female	C21.31	nestling	1	N1	1	0	1	1.25	Handler1	na	na	na	na	na	na	na
GBVx_2022-01-17	2021	2022-01-17	GBVx	Unknown	C21.33	fledgling	1	F1	1	0	2	2	Handler1	na	na	na	na	na	na	na
WRNx_2022-01-21	2021	2022-01-21	WRNx	Female	na	adult	3	A3	3	1	3	3	Handler4	na	na	na	na	na	na	na
RVHx_2022-01-27	2021	2022-01-27	RVHx	Male	C20.56	adult	3	A1	1	3	2	2	Handler1	2	A1	1	3	4	0	81
BYHx_2022-01-27	2021	2022-01-27	BYHx	Male	na	fledgling	1	F1	1	2	1	1	Handler4	na	na	na	na	na	na	na
OGNx_2022-01-27	2021	2022-01-27	OGNx	Male	na	fledgling	1	F1	1	6	4	4	Handler4	na	na	na	na	na	na	na

## Sheet: Key
	Variable	Definition
TrialID	TrialID	Unique trial ID for this set of behavioural assays (same subject on a given date)
Season	Season	tested during the 2019, 2020 or 2021 breeding season (e.g. the 2019 breeding season took place ~Sept 2019 to Feb 2020)
Date	Date	Date on which behavioural testing took place
BirdID	BirdID	Unique ID for each individual
Sex	Sex	Male, Female, or Unknown
SocialBrood	SocialBrood	Unique ID for the nest/brood in which the individual was raised (for individuals hatched 2019-21). Offspring sharing a social brood experienced the same rearing environment but are not necessarily full genetic siblings, due to high rates of extra-pair paternity in this species.
LifeStage	LifeStage	Ontogenetic stage when tested (nestling, fledgling, or adult).
HandlingTestNo	HandlingTestNo	Trial number for this set of handling assays, including trials at all stages (1 = first set of handling assays for this individual, 2 = second set of handling assays for this individual, etc.)
HandlingTestStage	HandlingTestStage	Trial number within each life stage for this set of handling assays (N1 = first trial at the nestling stage for this individual, F2 = second trial at the fledgling stage for this individual, etc., A2 = second trial at the adult stage for this individual)
HandlingTestAtStage	HandlingTestAtStage	The handling trial number within a given stage for this individual (range 1–4 for adult trials, 1–2 for fledgling trials, only 1 for nestlings)
Boldness_BackTestResponse	Boldness_BackTestResponse	Back-test response (number of struggles while subject held on its back for 30 secs)
Boldness_ProcessingResponse	Boldness_ProcessingResponse	Processing response (number of measurement procedures in which the subject struggled)
Boldness_ProcessingResponseAdjusted	Boldness_ProcessingResponseAdjusted	Processing response (as above), with nestling scores multiplied by 1.25 to account for nestlings undertaking one fewer measurement procedure (4 vs 5).
Handler	Handler	The experimenter who conducted the two handling assays (Handler1 = Andrew C. Katsis, Handler2 = Christine Evans, Handler3 = Diane Colombelli-Négrel, Handler4 = Lauren K. Common)
CageTrialNo	CageTrialNo	Trial number for this set of cage assays, including trials at all stages (1 = first trial for this individual, 2 = second trial for this individual, etc.)
CageTrialStage	CageTrialStage	Trial number within each life stage for this set of cage assays (F2 = second trial at the fledgling stage for this individual, A2 = second trial at the adult stage for this individual, etc.)
CageTrialAtStage	CageTrialAtStage	The cage trial number within a given stage for this individual (range 1–3 for adult trials, 1–2 for fledgling trials)
Exploration_UniqueSectorVisits	Exploration_UniqueSectorVisits	Number of unique cage sectors visited during a 5-minute exploration period.
Exploration_SectorVisits	Exploration_SectorVisits	Number of cage sectors visited (including repeat visits) during a 5-minute exploration period.
Aggressiveness_MirrorContacts	Aggressiveness_MirrorContacts	Number of times that the subject contact with the mirror during the 3-min mirror-stimulation test
Aggressiveness_TimeNearMirror	Aggressiveness_TimeNearMirror	Duration (in s) spent in the three sectors closest to the mirror, excluding time spent attacking the mirror
